# Supplementary material for: Fusion of Large-Scale Genomic Knowledge and Frequency Data Computationally Prioritizes Variants in Epilepsy
Source: PubMed Central journal article supplement (PMC3784560; doi:10.1371/journal.pgen.1003797), 2013-09-26

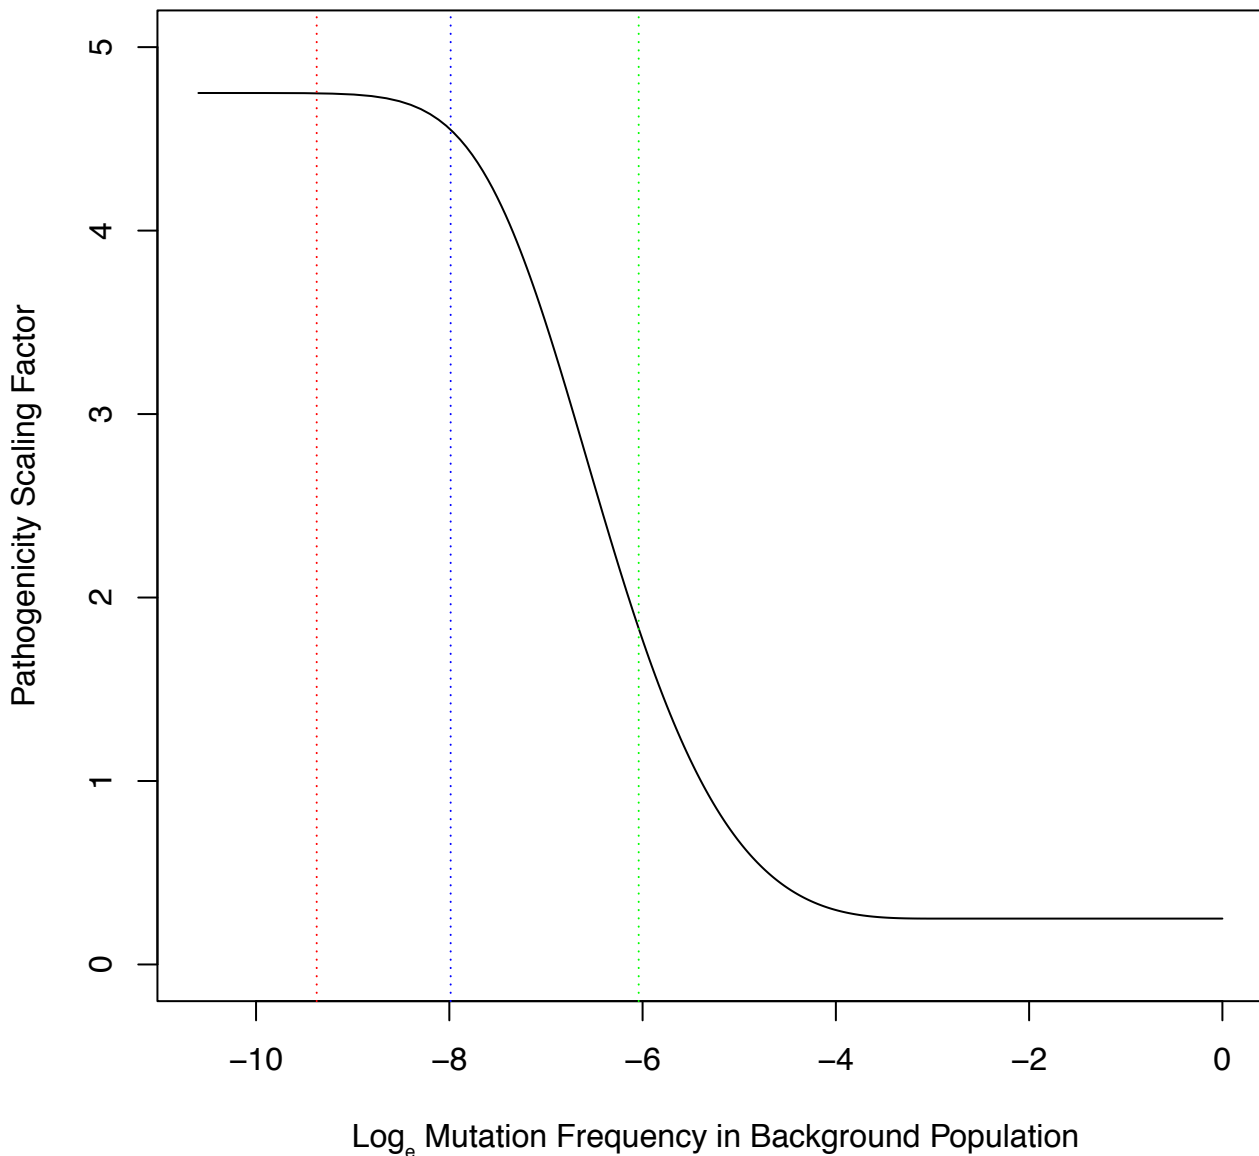

Supplement: pgen.1003797.s003.pdf [file pgen.1003797.s003.pdf]
